# Supplementary material
Source: PubMed Central journal article supplement (PMC8524950)
Supplement: 12885_2021_8832_MOESM1_ESM.pdf [file 12885_2021_8832_MOESM1_ESM.pdf]

**Worksheet 1: PROCEM**

SUBJECT BIRTHDATE (YYMMDD): \_\_\_\_\_

SUBJECT ID: \_\_\_\_\_

SUBJECT INITIALS: \_\_ \_\_

DATE OF MG (YYMMDD): \_\_\_\_\_

**PROCEM: MAMMOGRAPHY/TOMOSYNTHESIS**

|                                           |                            |                            |                            |                            |
|-------------------------------------------|----------------------------|----------------------------|----------------------------|----------------------------|
| <b>Breast density according to BIRADS</b> | <input type="checkbox"/> A | <input type="checkbox"/> B | <input type="checkbox"/> C | <input type="checkbox"/> D |
|-------------------------------------------|----------------------------|----------------------------|----------------------------|----------------------------|

**MAMMOGRAPHY/TOMOSYNTHESIS FINDINGS**

**RIGHT BREAST**

|                                     |                            |                            |                            |                            |                             |
|-------------------------------------|----------------------------|----------------------------|----------------------------|----------------------------|-----------------------------|
| <b>No. of pathological findings</b> | <input type="checkbox"/> 0 | <input type="checkbox"/> 1 | <input type="checkbox"/> 2 | <input type="checkbox"/> 3 | <input type="checkbox"/> >3 |
|-------------------------------------|----------------------------|----------------------------|----------------------------|----------------------------|-----------------------------|

|                                                  | Lesion A                                                                                                                                                                           | Lesion B                                                                                                                                                                           | Lesion C                                                                                                                                                                           |
|--------------------------------------------------|------------------------------------------------------------------------------------------------------------------------------------------------------------------------------------|------------------------------------------------------------------------------------------------------------------------------------------------------------------------------------|------------------------------------------------------------------------------------------------------------------------------------------------------------------------------------|
| <b>Localization clockwise (centre of lesion)</b> | _ _ _                                                                                                                                                                              | _ _ _                                                                                                                                                                              | _ _ _                                                                                                                                                                              |
| <b>Centre of lesion area from mamilla</b>        | cm                                                                                                                                                                                 | cm                                                                                                                                                                                 | cm                                                                                                                                                                                 |
| <b>Lesion size*</b>                              | mm                                                                                                                                                                                 | mm                                                                                                                                                                                 | mm                                                                                                                                                                                 |
| <b>Findings</b>                                  | <input type="checkbox"/> Mass<br><input type="checkbox"/> Mass + microcalc<br><input type="checkbox"/> Microcalc only<br><input type="checkbox"/> Other (Arch dist, asymmetry etc) | <input type="checkbox"/> Mass<br><input type="checkbox"/> Mass + microcalc<br><input type="checkbox"/> Microcalc only<br><input type="checkbox"/> Other (Arch dist, asymmetry etc) | <input type="checkbox"/> Mass<br><input type="checkbox"/> Mass + microcalc<br><input type="checkbox"/> Microcalc only<br><input type="checkbox"/> Other (Arch dist, asymmetry etc) |
| <b>Birads score</b>                              | <input type="checkbox"/> M1<br><input type="checkbox"/> M2<br><input type="checkbox"/> M3<br><input type="checkbox"/> M4<br><input type="checkbox"/> M5                            | <input type="checkbox"/> M1<br><input type="checkbox"/> M2<br><input type="checkbox"/> M3<br><input type="checkbox"/> M4<br><input type="checkbox"/> M5                            | <input type="checkbox"/> M1<br><input type="checkbox"/> M2<br><input type="checkbox"/> M3<br><input type="checkbox"/> M4<br><input type="checkbox"/> M5                            |

\* Enter 0 if lesion is not visible by this modality

|                                       |                                                          |
|---------------------------------------|----------------------------------------------------------|
| <b>Total extent malignant lesions</b> | mm                                                       |
| <b>Total extent w/ continuity?</b>    | <input type="checkbox"/> Yes <input type="checkbox"/> No |

|                              |  |
|------------------------------|--|
| <b>Comment in free text:</b> |  |
|------------------------------|--|

SIGNATURE RESPONSIBLE RADIOLOGIST: \_\_\_\_\_

SEE NEXT PAGE/SIDE FOR LEFT BREAST

SUBJECT BIRTHDATE (YYMMDD): \_ \_ \_ \_ \_

SUBJECT ID: \_ \_ \_ \_ \_

SUBJECT INITIALS: \_ \_

DATE OF MG (YYMMDD): \_ \_ \_ \_ \_

### MAMMOGRAPHY/TOMOSYNTHESIS FINDINGS

**LEFT BREAST**

|                                     |                                                                                                                                         |
|-------------------------------------|-----------------------------------------------------------------------------------------------------------------------------------------|
| <b>No. of pathological findings</b> | <input type="checkbox"/> 0 <input type="checkbox"/> 1 <input type="checkbox"/> 2 <input type="checkbox"/> 3 <input type="checkbox"/> >3 |
|-------------------------------------|-----------------------------------------------------------------------------------------------------------------------------------------|

|                                                  | Lesion A                                                                                                                                                                           | Lesion B                                                                                                                                                                           | Lesion C                                                                                                                                                                           |
|--------------------------------------------------|------------------------------------------------------------------------------------------------------------------------------------------------------------------------------------|------------------------------------------------------------------------------------------------------------------------------------------------------------------------------------|------------------------------------------------------------------------------------------------------------------------------------------------------------------------------------|
| <b>Localization clockwise (centre of lesion)</b> | — —                                                                                                                                                                                | — —                                                                                                                                                                                | — —                                                                                                                                                                                |
| <b>Centre of lesion area from mamilla</b>        | cm                                                                                                                                                                                 | cm                                                                                                                                                                                 | cm                                                                                                                                                                                 |
| <b>Lesion size*</b>                              | mm                                                                                                                                                                                 | mm                                                                                                                                                                                 | mm                                                                                                                                                                                 |
| <b>Findings</b>                                  | <input type="checkbox"/> Mass<br><input type="checkbox"/> Mass + microcalc<br><input type="checkbox"/> Microcalc only<br><input type="checkbox"/> Other (Arch dist, asymmetry etc) | <input type="checkbox"/> Mass<br><input type="checkbox"/> Mass + microcalc<br><input type="checkbox"/> Microcalc only<br><input type="checkbox"/> Other (Arch dist, asymmetry etc) | <input type="checkbox"/> Mass<br><input type="checkbox"/> Mass + microcalc<br><input type="checkbox"/> Microcalc only<br><input type="checkbox"/> Other (Arch dist, asymmetry etc) |
| <b>Birads score</b>                              | <input type="checkbox"/> M1<br><input type="checkbox"/> M2<br><input type="checkbox"/> M3<br><input type="checkbox"/> M4<br><input type="checkbox"/> M5                            | <input type="checkbox"/> M1<br><input type="checkbox"/> M2<br><input type="checkbox"/> M3<br><input type="checkbox"/> M4<br><input type="checkbox"/> M5                            | <input type="checkbox"/> M1<br><input type="checkbox"/> M2<br><input type="checkbox"/> M3<br><input type="checkbox"/> M4<br><input type="checkbox"/> M5                            |

\* Enter 0 if lesion is not visible by this modality

|                                       |                                                          |
|---------------------------------------|----------------------------------------------------------|
| <b>Total extent malignant lesions</b> | mm                                                       |
| <b>Total extent w/ continuity?</b>    | <input type="checkbox"/> Yes <input type="checkbox"/> No |

|                              |  |
|------------------------------|--|
| <b>Comment in free text:</b> |  |
|------------------------------|--|

SIGNATURE RESPONSIBLE RADIOLOGIST: \_\_\_\_\_
