# Supplementary material
Source: PubMed Central journal article supplement (PMC8524950)
Supplement: 12885_2021_8832_MOESM2_ESM.pdf [file 12885_2021_8832_MOESM2_ESM.pdf]

**Worksheet 2: PROCEM**

SUBJECT BIRTHDATE (YYMMDD): \_\_\_\_\_

SUBJECT ID: \_\_\_\_\_

SUBJECT INITIALS: \_\_ \_\_

DATE OF US (YYMMDD): \_\_\_\_\_

**PROCEM: BASELINE ULTRASOUND**

**ULTRASOUND FINDINGS**

**RIGHT BREAST**

|                                     |                            |                            |                            |                            |                             |
|-------------------------------------|----------------------------|----------------------------|----------------------------|----------------------------|-----------------------------|
| <b>No. of pathological findings</b> | <input type="checkbox"/> 0 | <input type="checkbox"/> 1 | <input type="checkbox"/> 2 | <input type="checkbox"/> 3 | <input type="checkbox"/> >3 |
|-------------------------------------|----------------------------|----------------------------|----------------------------|----------------------------|-----------------------------|

|                                                  | <b>Lesion A</b>                                                                                                                                                            | <b>Lesion B</b>                                                                                                                                                            | <b>Lesion C</b>                                                                                                                                                            |
|--------------------------------------------------|----------------------------------------------------------------------------------------------------------------------------------------------------------------------------|----------------------------------------------------------------------------------------------------------------------------------------------------------------------------|----------------------------------------------------------------------------------------------------------------------------------------------------------------------------|
| <b>Localization clockwise (centre of lesion)</b> | — —                                                                                                                                                                        | — —                                                                                                                                                                        | — —                                                                                                                                                                        |
| <b>Centre of lesion area from mamilla</b>        | cm                                                                                                                                                                         | cm                                                                                                                                                                         | cm                                                                                                                                                                         |
| <b>Lesion size*</b>                              | mm                                                                                                                                                                         | mm                                                                                                                                                                         | mm                                                                                                                                                                         |
| <b>Findings</b>                                  | <input type="checkbox"/> Mass<br><input type="checkbox"/> Mass + microcalc<br><input type="checkbox"/> Microcalc only<br><input type="checkbox"/> Other (Dist, cystic etc) | <input type="checkbox"/> Mass<br><input type="checkbox"/> Mass + microcalc<br><input type="checkbox"/> Microcalc only<br><input type="checkbox"/> Other (Dist, cystic etc) | <input type="checkbox"/> Mass<br><input type="checkbox"/> Mass + microcalc<br><input type="checkbox"/> Microcalc only<br><input type="checkbox"/> Other (Dist, cystic etc) |
| <b>BIRADS score</b>                              | <input type="checkbox"/> U1<br><input type="checkbox"/> U2<br><input type="checkbox"/> U3<br><input type="checkbox"/> U4<br><input type="checkbox"/> U5                    | <input type="checkbox"/> U1<br><input type="checkbox"/> U2<br><input type="checkbox"/> U3<br><input type="checkbox"/> U4<br><input type="checkbox"/> U5                    | <input type="checkbox"/> U1<br><input type="checkbox"/> U2<br><input type="checkbox"/> U3<br><input type="checkbox"/> U4<br><input type="checkbox"/> U5                    |

\* Enter 0 if lesion is not visible by this modality

|                                       |                                                          |
|---------------------------------------|----------------------------------------------------------|
| <b>Total extent malignant lesions</b> | mm                                                       |
| <b>Total extent w/ continuity?</b>    | <input type="checkbox"/> Yes <input type="checkbox"/> No |

|                              |  |
|------------------------------|--|
| <b>Comment in free text:</b> |  |
|------------------------------|--|

SIGNATURE RESPONSIBLE RADIOLOGIST: \_\_\_\_\_

SEE NEXT PAGE/SIDE FOR LEFT BREAST

SUBJECT BIRTHDATE (YYMMDD): \_\_\_\_\_

SUBJECT ID: \_\_\_\_\_

SUBJECT INITIALS: \_\_\_\_

DATE OF US (YYMMDD): \_\_\_\_\_

### ULTRASOUND FINDINGS

#### LEFT BREAST

|                              |                            |                            |                            |                            |                             |
|------------------------------|----------------------------|----------------------------|----------------------------|----------------------------|-----------------------------|
| No. of pathological findings | <input type="checkbox"/> 0 | <input type="checkbox"/> 1 | <input type="checkbox"/> 2 | <input type="checkbox"/> 3 | <input type="checkbox"/> >3 |
|------------------------------|----------------------------|----------------------------|----------------------------|----------------------------|-----------------------------|

|                                           | Lesion A                                                                                                                                                                   | Lesion B                                                                                                                                                                   | Lesion C                                                                                                                                                                   |
|-------------------------------------------|----------------------------------------------------------------------------------------------------------------------------------------------------------------------------|----------------------------------------------------------------------------------------------------------------------------------------------------------------------------|----------------------------------------------------------------------------------------------------------------------------------------------------------------------------|
| Localization clockwise (centre of lesion) | — —                                                                                                                                                                        | — —                                                                                                                                                                        | — —                                                                                                                                                                        |
| Centre of lesion area from mamilla        | cm                                                                                                                                                                         | cm                                                                                                                                                                         | cm                                                                                                                                                                         |
| Lesion size*                              | mm                                                                                                                                                                         | mm                                                                                                                                                                         | mm                                                                                                                                                                         |
| Findings                                  | <input type="checkbox"/> Mass<br><input type="checkbox"/> Mass + microcalc<br><input type="checkbox"/> Microcalc only<br><input type="checkbox"/> Other (Dist, cystic etc) | <input type="checkbox"/> Mass<br><input type="checkbox"/> Mass + microcalc<br><input type="checkbox"/> Microcalc only<br><input type="checkbox"/> Other (Dist, cystic etc) | <input type="checkbox"/> Mass<br><input type="checkbox"/> Mass + microcalc<br><input type="checkbox"/> Microcalc only<br><input type="checkbox"/> Other (Dist, cystic etc) |
| BIRADS score                              | <input type="checkbox"/> U1<br><input type="checkbox"/> U2<br><input type="checkbox"/> U3<br><input type="checkbox"/> U4<br><input type="checkbox"/> U5                    | <input type="checkbox"/> U1<br><input type="checkbox"/> U2<br><input type="checkbox"/> U3<br><input type="checkbox"/> U4<br><input type="checkbox"/> U5                    | <input type="checkbox"/> U1<br><input type="checkbox"/> U2<br><input type="checkbox"/> U3<br><input type="checkbox"/> U4<br><input type="checkbox"/> U5                    |

\* Enter 0 if lesion is not visible by this modality

|                                |                                                          |
|--------------------------------|----------------------------------------------------------|
| Total extent malignant lesions | mm                                                       |
| Total extent w/ continuity?    | <input type="checkbox"/> Yes <input type="checkbox"/> No |

|                              |  |
|------------------------------|--|
| <b>Comment in free text:</b> |  |
|------------------------------|--|

SIGNATURE RESPONSIBLE RADIOLOGIST: \_\_\_\_\_
