# Supplementary material
Source: PubMed Central journal article supplement (PMC8524950)
Supplement: 12885_2021_8832_MOESM6_ESM.pdf [file 12885_2021_8832_MOESM6_ESM.pdf]

**Worksheet 6: PROCEM**

SUBJECT BIRTHDATE (YYMMDD): \_\_\_\_\_

SUBJECT ID: \_\_\_\_\_

SUBJECT INITIALS: \_\_\_\_\_

**PROCEM: CEM**

DATE OF CEM (YYMMDD): \_\_\_\_\_

|                                   | <b>Right breast</b>                                                                                                                                                               | <b>Left breast</b>                                                                                                                                                                |
|-----------------------------------|-----------------------------------------------------------------------------------------------------------------------------------------------------------------------------------|-----------------------------------------------------------------------------------------------------------------------------------------------------------------------------------|
| <b>Background enhancement</b>     | <input type="checkbox"/> Minimal<br><input type="checkbox"/> Mild<br><input type="checkbox"/> Moderate<br><input type="checkbox"/> Marked                                         | <input type="checkbox"/> Minimal<br><input type="checkbox"/> Mild<br><input type="checkbox"/> Moderate<br><input type="checkbox"/> Marked                                         |
| <b>CEM findings</b>               | <input type="checkbox"/> Unifocal<br><input type="checkbox"/> Multifocal<br><input type="checkbox"/> Enhancement w/ benign appearance<br><input type="checkbox"/> Negative/normal | <input type="checkbox"/> Unifocal<br><input type="checkbox"/> Multifocal<br><input type="checkbox"/> Enhancement w/ benign appearance<br><input type="checkbox"/> Negative/normal |
| <b>No. of suspicious findings</b> | <input type="checkbox"/> 0 <input type="checkbox"/> 1 <input type="checkbox"/> 2 <input type="checkbox"/> 3 <input type="checkbox"/> >3                                           | <input type="checkbox"/> 0 <input type="checkbox"/> 1 <input type="checkbox"/> 2 <input type="checkbox"/> 3 <input type="checkbox"/> >3                                           |
| <b>Image quality</b>              | <input type="checkbox"/> Good<br><input type="checkbox"/> Poor (CEM cannot be assessed)<br><br><i>If poor, please describe reason:</i>                                            | <input type="checkbox"/> Good<br><input type="checkbox"/> Poor (CEM cannot be assessed)<br><br><i>If poor, please describe reason:</i>                                            |

|                              |  |
|------------------------------|--|
| <b>Comment in free text:</b> |  |
|------------------------------|--|

SIGNATURE RESPONSIBLE RADIOLOGIST: \_\_\_\_\_

SEE NEXT PAGE/SIDE

SUBJECT BIRTHDATE (YYMMDD): \_\_\_\_\_

SUBJECT ID: \_\_\_\_\_

SUBJECT INITIALS: \_\_\_\_

**CEM FINDINGS**

**RIGHT BREAST**

|                                                                                                                  | Lesion A                                                                                                                                                                                                                                                    | Lesion B                                                                                                                                                                                                                                                    | Lesion C                                                                                                                                                                                                                                                    | Lesion D                                                                                                                                                                                                                                                    | Lesion E                                                                                                                                                                                                                                                    |
|------------------------------------------------------------------------------------------------------------------|-------------------------------------------------------------------------------------------------------------------------------------------------------------------------------------------------------------------------------------------------------------|-------------------------------------------------------------------------------------------------------------------------------------------------------------------------------------------------------------------------------------------------------------|-------------------------------------------------------------------------------------------------------------------------------------------------------------------------------------------------------------------------------------------------------------|-------------------------------------------------------------------------------------------------------------------------------------------------------------------------------------------------------------------------------------------------------------|-------------------------------------------------------------------------------------------------------------------------------------------------------------------------------------------------------------------------------------------------------------|
| Localization clockwise (centre of lesion)                                                                        | ---                                                                                                                                                                                                                                                         | ---                                                                                                                                                                                                                                                         | ---                                                                                                                                                                                                                                                         | ---                                                                                                                                                                                                                                                         | ---                                                                                                                                                                                                                                                         |
| Centre of lesion from mamilla                                                                                    | cm                                                                                                                                                                                                                                                          | cm                                                                                                                                                                                                                                                          | cm                                                                                                                                                                                                                                                          | cm                                                                                                                                                                                                                                                          | cm                                                                                                                                                                                                                                                          |
| Lesion size*                                                                                                     | mm                                                                                                                                                                                                                                                          | mm                                                                                                                                                                                                                                                          | mm                                                                                                                                                                                                                                                          | mm                                                                                                                                                                                                                                                          | mm                                                                                                                                                                                                                                                          |
| CEM BIRADS score for malignancy                                                                                  | <input type="checkbox"/> 1 <input type="checkbox"/> 2 <input type="checkbox"/> 3<br><input type="checkbox"/> 4 <input type="checkbox"/> 5                                                                                                                   | <input type="checkbox"/> 1 <input type="checkbox"/> 2 <input type="checkbox"/> 3<br><input type="checkbox"/> 4 <input type="checkbox"/> 5                                                                                                                   | <input type="checkbox"/> 1 <input type="checkbox"/> 2 <input type="checkbox"/> 3<br><input type="checkbox"/> 4 <input type="checkbox"/> 5                                                                                                                   | <input type="checkbox"/> 1 <input type="checkbox"/> 2 <input type="checkbox"/> 3<br><input type="checkbox"/> 4 <input type="checkbox"/> 5                                                                                                                   | <input type="checkbox"/> 1 <input type="checkbox"/> 2 <input type="checkbox"/> 3<br><input type="checkbox"/> 4 <input type="checkbox"/> 5                                                                                                                   |
| Visual assesment of CEM enhancement in lesion/area                                                               | <input type="checkbox"/> Mild<br><input type="checkbox"/> Moderate<br><input type="checkbox"/> Marked                                                                                                                                                       | <input type="checkbox"/> Mild<br><input type="checkbox"/> Moderate<br><input type="checkbox"/> Marked                                                                                                                                                       | <input type="checkbox"/> Mild<br><input type="checkbox"/> Moderate<br><input type="checkbox"/> Marked                                                                                                                                                       | <input type="checkbox"/> Mild<br><input type="checkbox"/> Moderate<br><input type="checkbox"/> Marked                                                                                                                                                       | <input type="checkbox"/> Mild<br><input type="checkbox"/> Moderate<br><input type="checkbox"/> Marked                                                                                                                                                       |
| Enhancement corresponding to lesion on DM (visible on $\geq 2$ views) or baseline US?                            | <input type="checkbox"/> Yes<br><input type="checkbox"/> No                                                                                                                                                                                                 | <input type="checkbox"/> Yes<br><input type="checkbox"/> No                                                                                                                                                                                                 | <input type="checkbox"/> Yes<br><input type="checkbox"/> No                                                                                                                                                                                                 | <input type="checkbox"/> Yes<br><input type="checkbox"/> No                                                                                                                                                                                                 | <input type="checkbox"/> Yes<br><input type="checkbox"/> No                                                                                                                                                                                                 |
| If no, please describe orientation of enhancement not corresponding to lesion on DM or US (non-mass enhancement) | <i>If no, orientation:</i><br><input type="checkbox"/> Focal<br><input type="checkbox"/> Linear<br><input type="checkbox"/> Segmental<br><input type="checkbox"/> Regional<br><input type="checkbox"/> Multiple regions<br><input type="checkbox"/> Diffuse | <i>If no, orientation:</i><br><input type="checkbox"/> Focal<br><input type="checkbox"/> Linear<br><input type="checkbox"/> Segmental<br><input type="checkbox"/> Regional<br><input type="checkbox"/> Multiple regions<br><input type="checkbox"/> Diffuse | <i>If no, orientation:</i><br><input type="checkbox"/> Focal<br><input type="checkbox"/> Linear<br><input type="checkbox"/> Segmental<br><input type="checkbox"/> Regional<br><input type="checkbox"/> Multiple regions<br><input type="checkbox"/> Diffuse | <i>If no, orientation:</i><br><input type="checkbox"/> Focal<br><input type="checkbox"/> Linear<br><input type="checkbox"/> Segmental<br><input type="checkbox"/> Regional<br><input type="checkbox"/> Multiple regions<br><input type="checkbox"/> Diffuse | <i>If no, orientation:</i><br><input type="checkbox"/> Focal<br><input type="checkbox"/> Linear<br><input type="checkbox"/> Segmental<br><input type="checkbox"/> Regional<br><input type="checkbox"/> Multiple regions<br><input type="checkbox"/> Diffuse |
| Total extent malignant lesions                                                                                   |                                                                                                                                                                                                                                                             |                                                                                                                                                                                                                                                             |                                                                                                                                                                                                                                                             |                                                                                                                                                                                                                                                             | mm                                                                                                                                                                                                                                                          |
| Total extent w/ continuity?                                                                                      |                                                                                                                                                                                                                                                             |                                                                                                                                                                                                                                                             |                                                                                                                                                                                                                                                             |                                                                                                                                                                                                                                                             | <input type="checkbox"/> Yes <input type="checkbox"/> No                                                                                                                                                                                                    |
| Second look ultrasound needed?                                                                                   |                                                                                                                                                                                                                                                             |                                                                                                                                                                                                                                                             |                                                                                                                                                                                                                                                             |                                                                                                                                                                                                                                                             | <input type="checkbox"/> Yes <input type="checkbox"/> No                                                                                                                                                                                                    |

\*Enter 0 if lesion not visible by CEM

SIGNATURE RESPONSIBLE RADIOLOGIST: \_\_\_\_\_

SEE NEXT PAGE/SIDE FOR LEFT BREAST

SUBJECT BIRTHDATE (YYMMDD): \_\_\_\_\_

SUBJECT ID: \_\_\_\_\_

SUBJECT INITIALS: \_\_\_\_

**CEM FINDINGS**

**LEFT BREAST**

|                                                                                                                  | Lesion A                                                                                                                                                                                                                                                    | Lesion B                                                                                                                                                                                                                                                    | Lesion C                                                                                                                                                                                                                                                    | Lesion D                                                                                                                                                                                                                                                    | Lesion E                                                                                                                                                                                                                                                    |
|------------------------------------------------------------------------------------------------------------------|-------------------------------------------------------------------------------------------------------------------------------------------------------------------------------------------------------------------------------------------------------------|-------------------------------------------------------------------------------------------------------------------------------------------------------------------------------------------------------------------------------------------------------------|-------------------------------------------------------------------------------------------------------------------------------------------------------------------------------------------------------------------------------------------------------------|-------------------------------------------------------------------------------------------------------------------------------------------------------------------------------------------------------------------------------------------------------------|-------------------------------------------------------------------------------------------------------------------------------------------------------------------------------------------------------------------------------------------------------------|
| Localization clockwise (centre of lesion)                                                                        | ---                                                                                                                                                                                                                                                         | ---                                                                                                                                                                                                                                                         | ---                                                                                                                                                                                                                                                         | ---                                                                                                                                                                                                                                                         | ---                                                                                                                                                                                                                                                         |
| Centre of lesion from mamilla                                                                                    | cm                                                                                                                                                                                                                                                          | cm                                                                                                                                                                                                                                                          | cm                                                                                                                                                                                                                                                          | cm                                                                                                                                                                                                                                                          | cm                                                                                                                                                                                                                                                          |
| Lesion size*                                                                                                     | mm                                                                                                                                                                                                                                                          | mm                                                                                                                                                                                                                                                          | mm                                                                                                                                                                                                                                                          | mm                                                                                                                                                                                                                                                          | mm                                                                                                                                                                                                                                                          |
| CEM BIRADS score for malignancy                                                                                  | <input type="checkbox"/> 1 <input type="checkbox"/> 2 <input type="checkbox"/> 3<br><input type="checkbox"/> 4 <input type="checkbox"/> 5                                                                                                                   | <input type="checkbox"/> 1 <input type="checkbox"/> 2 <input type="checkbox"/> 3<br><input type="checkbox"/> 4 <input type="checkbox"/> 5                                                                                                                   | <input type="checkbox"/> 1 <input type="checkbox"/> 2 <input type="checkbox"/> 3<br><input type="checkbox"/> 4 <input type="checkbox"/> 5                                                                                                                   | <input type="checkbox"/> 1 <input type="checkbox"/> 2 <input type="checkbox"/> 3<br><input type="checkbox"/> 4 <input type="checkbox"/> 5                                                                                                                   | <input type="checkbox"/> 1 <input type="checkbox"/> 2 <input type="checkbox"/> 3<br><input type="checkbox"/> 4 <input type="checkbox"/> 5                                                                                                                   |
| Visual assesment of CEM enhancement in lesion/area                                                               | <input type="checkbox"/> Mild<br><input type="checkbox"/> Moderate<br><input type="checkbox"/> Marked                                                                                                                                                       | <input type="checkbox"/> Mild<br><input type="checkbox"/> Moderate<br><input type="checkbox"/> Marked                                                                                                                                                       | <input type="checkbox"/> Mild<br><input type="checkbox"/> Moderate<br><input type="checkbox"/> Marked                                                                                                                                                       | <input type="checkbox"/> Mild<br><input type="checkbox"/> Moderate<br><input type="checkbox"/> Marked                                                                                                                                                       | <input type="checkbox"/> Mild<br><input type="checkbox"/> Moderate<br><input type="checkbox"/> Marked                                                                                                                                                       |
| Enhancement corresponding to lesion on DM (visible on ≥ 2 views) or baseline US?                                 | <input type="checkbox"/> Yes<br><input type="checkbox"/> No                                                                                                                                                                                                 | <input type="checkbox"/> Yes<br><input type="checkbox"/> No                                                                                                                                                                                                 | <input type="checkbox"/> Yes<br><input type="checkbox"/> No                                                                                                                                                                                                 | <input type="checkbox"/> Yes<br><input type="checkbox"/> No                                                                                                                                                                                                 | <input type="checkbox"/> Yes<br><input type="checkbox"/> No                                                                                                                                                                                                 |
| If no, please describe orientation of enhancement not corresponding to lesion on DM or US (non-mass enhancement) | <i>If no, orientation:</i><br><input type="checkbox"/> Focal<br><input type="checkbox"/> Linear<br><input type="checkbox"/> Segmental<br><input type="checkbox"/> Regional<br><input type="checkbox"/> Multiple regions<br><input type="checkbox"/> Diffuse | <i>If no, orientation:</i><br><input type="checkbox"/> Focal<br><input type="checkbox"/> Linear<br><input type="checkbox"/> Segmental<br><input type="checkbox"/> Regional<br><input type="checkbox"/> Multiple regions<br><input type="checkbox"/> Diffuse | <i>If no, orientation:</i><br><input type="checkbox"/> Focal<br><input type="checkbox"/> Linear<br><input type="checkbox"/> Segmental<br><input type="checkbox"/> Regional<br><input type="checkbox"/> Multiple regions<br><input type="checkbox"/> Diffuse | <i>If no, orientation:</i><br><input type="checkbox"/> Focal<br><input type="checkbox"/> Linear<br><input type="checkbox"/> Segmental<br><input type="checkbox"/> Regional<br><input type="checkbox"/> Multiple regions<br><input type="checkbox"/> Diffuse | <i>If no, orientation:</i><br><input type="checkbox"/> Focal<br><input type="checkbox"/> Linear<br><input type="checkbox"/> Segmental<br><input type="checkbox"/> Regional<br><input type="checkbox"/> Multiple regions<br><input type="checkbox"/> Diffuse |
| Total extent malignant lesions                                                                                   |                                                                                                                                                                                                                                                             |                                                                                                                                                                                                                                                             |                                                                                                                                                                                                                                                             |                                                                                                                                                                                                                                                             | mm                                                                                                                                                                                                                                                          |
| Total extent w/ continuity?                                                                                      |                                                                                                                                                                                                                                                             |                                                                                                                                                                                                                                                             |                                                                                                                                                                                                                                                             |                                                                                                                                                                                                                                                             | <input type="checkbox"/> Yes <input type="checkbox"/> No                                                                                                                                                                                                    |
| Second look ultrasound needed?                                                                                   |                                                                                                                                                                                                                                                             |                                                                                                                                                                                                                                                             |                                                                                                                                                                                                                                                             |                                                                                                                                                                                                                                                             | <input type="checkbox"/> Yes <input type="checkbox"/> No                                                                                                                                                                                                    |

\*Enter 0 if lesion not visible by CEM

SIGNATURE RESPONSIBLE RADIOLOGIST: \_\_\_\_\_
