# Supplementary material
Source: PubMed Central journal article supplement (PMC8524950)
Supplement: 12885_2021_8832_MOESM7_ESM.pdf [file 12885_2021_8832_MOESM7_ESM.pdf]

**Worksheet 7: PROCEM**

SUBJECT BIRTHDATE (YYMMDD): \_\_\_\_\_

SUBJECT ID: \_\_\_\_\_

SUBJECT INITIALS: \_\_ \_\_

DATE OF MG (YYMMDD): \_\_\_\_\_

**PROCEM: SECOND LOOK US & ADDITIONAL CORE BIOPSY**

|                                              | Right breast                                                | Left breast                                                 |
|----------------------------------------------|-------------------------------------------------------------|-------------------------------------------------------------|
| Second look ultrasound performed?            | <input type="checkbox"/> Yes<br><input type="checkbox"/> No | <input type="checkbox"/> Yes<br><input type="checkbox"/> No |
| Extra CEM findings detectable at ultrasound? | <input type="checkbox"/> Yes<br><input type="checkbox"/> No | <input type="checkbox"/> Yes<br><input type="checkbox"/> No |

**ULTRASOUND FINDINGS**

**RIGHT BREAST**

|                                                                 | Lesion A                     | Lesion B                     | Lesion C                     | Lesion D                     | Lesion E                     |
|-----------------------------------------------------------------|------------------------------|------------------------------|------------------------------|------------------------------|------------------------------|
| <b>BIRADS score</b>                                             | <input type="checkbox"/> U1  | <input type="checkbox"/> U1  | <input type="checkbox"/> U1  | <input type="checkbox"/> U1  | <input type="checkbox"/> U1  |
|                                                                 | <input type="checkbox"/> U2  | <input type="checkbox"/> U2  | <input type="checkbox"/> U2  | <input type="checkbox"/> U2  | <input type="checkbox"/> U2  |
|                                                                 | <input type="checkbox"/> U3  | <input type="checkbox"/> U3  | <input type="checkbox"/> U3  | <input type="checkbox"/> U3  | <input type="checkbox"/> U3  |
|                                                                 | <input type="checkbox"/> U4  | <input type="checkbox"/> U4  | <input type="checkbox"/> U4  | <input type="checkbox"/> U4  | <input type="checkbox"/> U4  |
|                                                                 | <input type="checkbox"/> U5  | <input type="checkbox"/> U5  | <input type="checkbox"/> U5  | <input type="checkbox"/> U5  | <input type="checkbox"/> U5  |
| <b>Additional core biopsy performed due to findings at CEM?</b> | <input type="checkbox"/> Yes | <input type="checkbox"/> Yes | <input type="checkbox"/> Yes | <input type="checkbox"/> Yes | <input type="checkbox"/> Yes |
|                                                                 | <input type="checkbox"/> No  | <input type="checkbox"/> No  | <input type="checkbox"/> No  | <input type="checkbox"/> No  | <input type="checkbox"/> No  |
| <b>Comment in free text:</b>                                    |                              |                              |                              |                              |                              |

**LEFT BREAST**

|                                                                 | Lesion A                     | Lesion B                     | Lesion C                     | Lesion D                     | Lesion E                     |
|-----------------------------------------------------------------|------------------------------|------------------------------|------------------------------|------------------------------|------------------------------|
| <b>BIRADS score</b>                                             | <input type="checkbox"/> U1  | <input type="checkbox"/> U1  | <input type="checkbox"/> U1  | <input type="checkbox"/> U1  | <input type="checkbox"/> U1  |
|                                                                 | <input type="checkbox"/> U2  | <input type="checkbox"/> U2  | <input type="checkbox"/> U2  | <input type="checkbox"/> U2  | <input type="checkbox"/> U2  |
|                                                                 | <input type="checkbox"/> U3  | <input type="checkbox"/> U3  | <input type="checkbox"/> U3  | <input type="checkbox"/> U3  | <input type="checkbox"/> U3  |
|                                                                 | <input type="checkbox"/> U4  | <input type="checkbox"/> U4  | <input type="checkbox"/> U4  | <input type="checkbox"/> U4  | <input type="checkbox"/> U4  |
|                                                                 | <input type="checkbox"/> U5  | <input type="checkbox"/> U5  | <input type="checkbox"/> U5  | <input type="checkbox"/> U5  | <input type="checkbox"/> U5  |
| <b>Additional core biopsy performed due to findings at CEM?</b> | <input type="checkbox"/> Yes | <input type="checkbox"/> Yes | <input type="checkbox"/> Yes | <input type="checkbox"/> Yes | <input type="checkbox"/> Yes |
|                                                                 | <input type="checkbox"/> No  | <input type="checkbox"/> No  | <input type="checkbox"/> No  | <input type="checkbox"/> No  | <input type="checkbox"/> No  |
| <b>Comment in free text:</b>                                    |                              |                              |                              |                              |                              |

SIGNATURE RESPONSIBLE RADIOLOGIST: \_\_\_\_\_
